# Supplementary material
Source: PubMed Central journal article supplement (PMC10840738)
Supplement: NIHMS1926140-supplement-1.pdf [file NIHMS1926140-supplement-1.pdf]

## **Supplementary Material**

*Supplementary Table 1: Kinase motifs with alternative conformations. For each of the three kinases there are four motifs with differing conformations among the experimentally determined ensemble members. Three of the motifs are common to all three kinases and are related to their enzymatic activity (see text).*

| Kinase | Motif               | Residue range<br>(target numbering) | Experimental<br>ensemble<br>members<br>difference <sup>1</sup> , Å | Smallest CASP<br>model difference to<br>NMR/X-ray <sup>2</sup> , Å | # of groups<br>within 20% of<br>the NMR best <sup>3</sup> |
|--------|---------------------|-------------------------------------|--------------------------------------------------------------------|--------------------------------------------------------------------|-----------------------------------------------------------|
| T1195  | β sheet             | 4-46, 74-85                         | 4.9                                                                | 2.9 / 1.1                                                          | 15                                                        |
|        | αC helix            | 47-64                               | 7.4                                                                | 2.3 / 1.2                                                          | 1                                                         |
|        | Activation<br>loop  | 150-169                             | Mainly<br>disordered in<br>X-ray                                   | 3.0 / na                                                           | 0                                                         |
|        | Additional<br>motif | 87-103                              | 2.3                                                                | 1.6 / 0.7                                                          | 3                                                         |
| T1196  | β sheet             | 4-41, 88-108                        | 4.3                                                                | 1.3 / 1.4                                                          | 3                                                         |
|        | αC helix            | 57-80                               | 2.7                                                                | 0.9/ 0.8                                                           | 3                                                         |
|        | Activation<br>loop  | 171-184                             | Disordered<br>in X-ray                                             | 4.2 / na                                                           | 16                                                        |
|        | Additional<br>motif | 314-332                             | 4.9                                                                | 3.1 / 0.9                                                          | 21                                                        |
| T1197  | β sheet             | 19-38, 84-92                        | 3.4 / 1.8                                                          | 0.8 / 2.7 / 0.9                                                    | 0                                                         |
|        | αC helix            | 53-69                               | 3.5 / 1.6                                                          | 1.2 / 3.2 / 0.8                                                    | 21                                                        |
|        | Activation<br>loop  | 162-180                             | 10.8 / 4.1                                                         | 3.3 / 1.7 / 1.9                                                    | 14                                                        |
|        | Additional<br>motif | 222-235                             | 3.3 / 1.1                                                          | 0.8 / 3.1 / 0.9                                                    | 3                                                         |

<sup>1</sup> - average Cα distance for residues in a motif between two experimental ensemble conformations. For T1197, with three members in the ensemble, the distances between the NMR structure and the two PDB-derived models are given;

<sup>2</sup> - average Cα distance between the closest computed model in the submission and the experimental NMR and PDB-derived structures (each submission consists of five models). For T1197, distances to all three experimental structures are given;

<sup>3</sup> - number of additional groups with CASP models within 20% of the closest distance to experiment.
